# Supplementary material for: Arene ruthenium complexes with pyridyloxazolines: synthesis and applications as asymmetric catalysts for Diels–Alder reactions †
Source: Royal Society of Chemistry journal article supplement (doi:10.1039/b006530g), 2000-01-01
Supplement: b006530g.doc [file b006530g.doc]

SUPPLEMENTARY MATERIAL

**Preparation of** **[Ru(OH2)(Me2-pymox)(mes)][SbF6]2** **(13)**

Complex **13** was prepared from **1** (100 mg, 0.15 mmol), and AgSbF6 (52 mg, 0.15 mmol), giving **13** (112 mg, 84%). Anal. Calcd for C19H26F12N2O2RuSb2: C, 25.73; H, 2.95; N, 3.16. Found C, 25.44; H, 2.85; N, 3.02 %. 1H NMR (CD2Cl2:d6-acetone, 10:1):  1.52 (s, 3H, *Me*CMe'), 1.90 (s, 3H, MeC*Me*'), 2.35 (s, 9H, C6*Me3*), 4.58 and 4.75 (2  d, 1H, *J* 9 Hz, 2  OCH), 5.50 (s, 2H, H2O), 5.95 (s, 3H, C6*H3*Me3), 7.96 (m, 2H, pyH), 8.24 (t, 1H, *J* 8 Hz, py-4-H), 9.40 (d, 1H, *J* 5 Hz, py-6-H). MS (FAB+): m/z 633 [M - OH2 + SbF6]+, 415 [M-H]+.

**Preparation of** **[Ru(OH2)(Et-pymox)(mes)][SbF6]2** **(14)**

Complex **14** was prepared from **2** (100 mg, 0.15 mmol), and AgSbF6 (51 mg, 0.15 mmol), giving **14** (124 mg, 93%). Anal. Calcd for C19H26F12N2O2RuSb2: C, 25.22; H, 3.12; N, 3.10. Found C, 25.08; H, 3.09; N, 3.03 %. 1H NMR (d6-acetone):  0.92 (t, 3H, *J* 7 Hz, CH*Me*), 1.51 and 2.19 (2 x m, 1H, C*H2*Me), 2.28 (s, 9H, C6*Me3*), 4.79 (t, 1H, *J* 8 Hz, OCH), 5.13 (m, 1H, NCH), 5.20 (m, 1H, OCH), 5.82 (s, 3H, C6*H3*Me3), 6.33 (br s, 2H, H2O), 8.02 (m, 2H, pyH), 8.34 (m, 1H, py-H), 9.73 (d, 1H, *J* 5 Hz, py-6-H). MS (FAB+): m/z 633 [M - OH2 + SbF6]+, 415 [M-H]+.

**Preparation of** **[Ru(OH2)(Ph-pymox)(mes)][SbF6]2** **(15)**

Complex **15** was prepared from **3** (100 mg, 0.14 mmol), and AgSbF6 (48 mg, 0.14 mmol), giving **15** (118 mg, 90%). 1H NMR (CD2Cl2:d6-acetone, 10:1):  2.10 (s, 9H, C6*Me3*), 4.68 (t, 1H, *J* 10 Hz, OCH), 5.29 (s, 3H, C6*H3*Me3), 5.00 (br s, 2H, H2O), 5.50 (t, 1H, *J* 10 Hz, OCH), 6.01 (t, 1H, *J* 10 Hz, NCH), 7.29 (m, 2H, Ph), 7.43 (m, 3H, Ph), 7.88 (m, 1H, py-5-H), 7.99 (d, 1H, *J* 7 Hz, py-3-H), 8.18 (t, 1H, *J* 7 Hz, py-4-H), 9.32 (d, 1H, *J* 5 Hz, py-6-H). MS (FAB+): m/z 681 [M - OH2 + SbF6]+, 463 [M-H]+.

**Preparation of** **[Ru(OH2)(Bz-pymox)(mes)][SbF6]2** **(16)**

Complex **16** was prepared from **4** (100 mg, 0.137 mmol), and AgSbF6 (47 mg, 0.137 mmol), giving **16** (113 mg, 87%). 1H NMR (CD2Cl2:d6-acetone, 10:1):  2.29 (s, 9H, C6*Me3*), 2.67 (dd, 1H, *J* 14, 11 Hz, C*H*2Ph), 3.46 (dd, 1H, *J* 14, 3.5 Hz, C*H*2Ph), 4.68 (dd, 1H, *J* 9, 5.5 Hz, OCH) 5.04 (t, 1H, *J* 9 Hz, OCH), 5.33 (m,1H, NCH), 5.45 (br s, 2H, H2O), 5.56 (s, 3H, C6*H3*Me3), 7.27 (m, 2H, Ph), 7.37 (m, 3H, Ph) 7.92 (m, 2H, pyH), 8.19 (t, 1H, *J* 8 Hz, py-4-H), 9.47 (d, 1H, *J* 5.5 Hz, py-6-H). MS (FAB+): m/z 695 [M - OH2 + SbF6]+, 477 [M-H]+.

**Preparation of** **[Ru(OH2)(tBu-pymox)(mes)][SbF6]2** **(18)**

Complex **18** was prepared from **6** (100 mg, 0.144 mmol), and AgSbF6 (50 mg, 0.146 mmol), giving **18** (117 mg, 89%). 1H NMR (CD2Cl2:d6-acetone, 10:1):  1.02 (s, 9H, CMe3), 2.31 (s, 9H, C6*Me3*), 4.72 (m, 1H, NCH), 4.96 (m, 1H, OCH), 5.05 (t, 1H, *J* 9 Hz, OCH), 5.73 (s, 3H, C6*H3*Me3), 5.82 (br s, 2H, H2O), 7.93 (m, 2H, pyH), 8.24 (t, 1H, *J* 7 Hz, py-4-H), 9.37 (d, 1H, *J* 5 Hz, py-6-H). MS (FAB+): m/z 661 [M - OH2 + SbF6]+, 443 [M-H]+.

**Preparation of** **[Ru(OH2)(iPr-pymox)(*p*-cymene)]SbF6** **(19)**

Complex **19** was prepared from **7** (70 mg, 0.101 mmol), and AgSbF6 (35 mg, 0.102 mmol), giving **19** (84 mg, 91%). 1H NMR (d6-acetone): major isomer  0.88 and 1.19 (2  d, 3H, *J* 6.5 Hz, CH*Me*2), 1.22 and 1.25 (2  d, 3H, *J* 6.5 Hz, CH*Me*2), 2.35 (s, 3H, Ar-Me), 2.63 (m, 1H, C*H*Me2), 5.22 (t, 1H, *J* 9 Hz, OCH), 5.28 (t, 1H, *J* 9 Hz, OCH), 5.40 (m, 1H, NCH), 6.43 (br s, 2H, H2O), 6.60 and 6.85 (2  d, 2H, *J* 6 Hz, Ar-H), 8.25 (m, 1H, py-5-H), 8.31 (d, 1H, *J* 7.5 Hz, py-3-H), 8.60 (t, 1H, *J* 7.5 Hz, py-4-H), 10.03 (d, 1H, *J* 5 Hz, py-6-H); minor isomer  0.97 and 1.15 (2  d, 3H, *J* 6.5 Hz, CH*Me*2), 2.33 (s, 3H, Ar-Me), 2.82 (m, 1H, C*H*Me2), 5.52 (m, 1H, NCH), 6.77 (m, Ar-H), 10.05 (d, 1H, *J* 5 Hz, py-6-H). MS (FAB+): m/z 661 [M - OH2 + SbF6]+, 443 [M-H]+.

**Preparation of** **[Ru(OH2)(tBu-pymox)(*p*-cymene)][SbF6]2** **(20)**

Complex **20** was prepared from **8** (85 mg, 0.12 mmol), and AgSbF6 (45 mg, 0.13 mmol), giving **20** (101 mg, 91%). 1H NMR (d6-acetone):  .03 and 1.09 (2  d, 3H, *J* 6.5 Hz, CH*Me*2), 1.06 (s, 9H, CMe3), 2.17 (s, 3H, Ar-Me), 4.88 (dd, *J* 8, 4 Hz, 1H, NC*H*), 5.08 (m, 2H, OC*H*2), 5.93 (d, 1H, *J* 6 Hz, Ar-H), 6.08 (m, 3H, Ar-H), 6.23 (br s, 2H, H2O), 7.98 (m, 2H, py-H), 8.27 (m, 1H, py-4-H), 9.53 (d, 1H, *J* 5 Hz, py-6-H). MS (FAB+): m/z 675 [M - OH2 + SbF6]+, 457 [M-H]+.

**Preparation of** **[Ru(OH2)(iPr-pymox)(benzene)][SbF6]2** **(21)**

Complex **21** was prepared from **9** (70 mg, 0.109 mmol), and AgSbF6 (38 mg, 0.111 mmol), giving **21** (86 mg, 92%). 1H NMR (d6-acetone):  0.83 and 1.13 (2  d, 3H, *J* 7 Hz, CH*Me*2), 2.6 (m, 1H, C*H*Me2), 5.16 (m, 2H, OCH2), 5.39 (ddd, 1H, *J* 10, 7, 3Hz, NCH), 6.47 (s, 6H, C6H6), 8.08 (m, 1H, py-5-H), 7.12 (br s, 2H, H2O), 8.15 (d, 1H, *J* 7 Hz, py-3-H), 8.46 (dt, 1H, *J* 7, 1 Hz, py-4-H), 9.94 (d, 1H, *J* 5 Hz, py-6-H, ) minor isomer [6.53 (s, 6H, C6H6), 10.01 (d, *J* 5 Hz, py-6-H,)]. MS (FAB+): m/z 605 [M - OH2 + SbF6]+, 387 [M-H]+.

**Preparation of** **[Ru(OH2)(tBu-pymox)(benzene)][SbF6]2** **(22)**

Complex **22** was prepared from **10** (64 mg, 0.10 mmol), and AgSbF6 (34 mg, 0.10 mmol), giving **22** (80 mg, 94%). Anal. Calcd for C18H24F12N2O2RuSb2: C, 24.27; H, 2.94; N, 3.14. Found C, 24.11; H, 2.89; N, 3.05 %. 1H NMR (d6-acetone):  1.16 (s, 9H, CMe3), 5.24 (m, 3H, OC*H*2, NC*H*), 6.46 (s, 6H, C6H6), 7.33 (br s, 2H, H2O), 8.11 (m, 1H, pyH), 8.19 (d, 1H, *J* 7 Hz, pyH), 8.50 (t, 1H, *J* 7 Hz, pyH), 9.94 (d, 1H, *J* 5 Hz, py-6-H). MS (FAB+): m/z 619 [M - OH2 + SbF6]+, 401 [M-H]+.

**Preparation of** **[Ru(OH2)(iPr-pymox)(C6Me6)][SbF6]2** **(23)**

Complex **23** was prepared from **11** (84 mg, 0.116 mmol), and AgSbF6 (41 mg, 0.119 mmol), giving **23** (83 mg, 76%). Anal. Calcd for C23H34F12N2O2RuSb2: C, 29.29; H, 3.63; N, 2.97. Found C, 29.03; H, 3.51; N, 2.84 %. 1H NMR (d6-acetone):  0.68 and 1.17 (2  d, 3H, *J* 6.5 Hz, CH*Me*2), 2.26 (m, 1H, C*H*Me2), 2.41 (s, 18H, C6Me6), 5.19 (m, 4H, OCH2 + H2O), 5.28 (m, 1H, NCH), 8.15 (m, 2H, py-3H + 5H), 8.45 (td,1H, *J* 7, 1 Hz, py-4-H), 9.51 (dd, 1H, *J* 6, 1 Hz, py-6-H). MS (FAB+): m/z 689 [M - OH2 + SbF6]+, 471 [M-H]+.

**Preparation of** **[Ru(OH2)(indanyl-pymox)(mes)][SbF6]2** **(24)**

Complex **24** was prepared from **12** (90 mg, 0.123 mmol), and AgSbF6 (44 mg, 0.128 mmol), giving **24** (112 mg, 96%). Anal. Calcd forC23H34F12N2O2RuSb2: C, 30.44; H, 2.77; N, 2.96. Found C, 30.29; H, 2.82; N, 2.69 %. 1H NMR (d6-acetone):  2.49 (s, 9H, C6*Me3*), 3.49 (d, 1H, *J* 19 Hz, C*H*H’Ph), 3.75 (dd, 1H, *J* 19, 7 Hz, CH*H*’Ph), 6.08 (s, 3H, C6*H3*Me3), 6.11 (br s, 2H, H2O), 6.36 (dd, 1H, *J* 8, 7 Hz, OCH), 6.71 (d, 1H, *J* 8 Hz, NCH), 7.35 (m, 3H, Ph), 7.82 (d, 1H, *J* 7 Hz, Ph), 8.07 (m, 1H, py-5-H), 8.16 (d, 1H, py-3-H), 8.41 (t, 1H, *J* 7 Hz, py-4-H), 9.79 (d, 1H, *J* 7 Hz, py-6-H). MS (FAB+): m/z 693 [M - OH2 + SbF6]+, 475 [M-H]+.
